# Supplementary material for: Prognostic value of von Willebrand factor levels in patients with metastatic melanoma treated by immune checkpoint inhibitors
Source: HighWire-hosted journal article supplement (doi:10.1136/jitc-2022-006456), 2023-05-01
Supplement: jitc-2022-006456supp005_data_supplement.pdf [file jitc-2022-006456supp005_data_supplement.pdf]

## SUPPLEMENTARY FIGURE LEGENDS

**Supplementary Figure 1:** Influence of prior lines of treatment on ICI therapy outcome Kaplan-Meier analysis for progression-free survival (A; PFS) and overall survival (B; OS) comparing patients with therapies before ICI treatment with participants receiving ICI as first line therapy. (C): Comparison of participants with therapies before ICI treatment with participants receiving ICI as first line therapy according to the plasmatic vWF levels (ng/ml). Data are presented as box blots showing the mean and the standard deviation.

**Supplementary Figure 2:** Multivariable Cox logistic regression analysis of PFS and OS. (A) Multivariate PFS analysis of vWF:Ag baseline levels with ECOG and BRAF mutation status. (B) Multivariate PFS analysis of vWF:Ag baseline levels with LDH and S100 levels. (C) Multivariate OS analysis of vWF:Ag baseline levels with ECOG and BRAF mutation status. (D) Multivariate OS analysis of vWF:Ag baseline levels with LDH and S100 levels.

(E,F): Multivariate PFS (E) and OS (F) analysis of D-dimers baseline levels with ECOG and BRAF mutation status.

**Supplementary Figure 3:** A-F: Comparison of the different biological parameters levels at baseline between primary resistance and primary response groups. NLR, neutrophil to lymphocyte ratio. Median, minimum and maximum values are shown.

**Supplementary Figure 4:** Evolution profiles of standard biological parameters during the course of ICI. A, C, E, G: Comparison of primary resistance and primary response groups at 6, 12 and 24 weeks for LDH (A), S100 (C), CRP (E) and NLR (G).

B, D, F, H: LDH (B), S100 (D), CRP (F) and NLR (H) measurements within primary resistance and primary response groups at baseline, 6, 12 and 24 weeks.

**Supplemental Table 1: Total number of patients available at each time point for each parameter analysed.** Reasons for a not even number of patients at the different time points are diverse, either due to tumor evolution (therapy switch after a progression, occurrence of severe side effects, or dramatic progression leading to death) or due to a non-systematic record of bioclinical parameters during the course of therapy.

|                    | Baseline | 6 weeks | 12 weeks | 24 weeks |
|--------------------|----------|---------|----------|----------|
| LDH                | 79       | 56      | 52       | 46       |
| S100               | 75       | 52      | 47       | 40       |
| CRP                | 75       | 53      | 48       | 43       |
| NLR                | 55       | 33      | 28       | 19       |
| Platelets          | 78       | 57      | 52       | 42       |
| D-Dimers           | 66       | 40      | 40       | 36       |
| ADAMTS-13 activity | 49       | 43      | 31       | 25       |
| VWF:Ag             | 83       | 64      | 55       | 47       |

**Supplemental Table 2: Pearson correlation coefficients between the biological parameters at baseline.** Among all correlations tested, only the significant ones are figured.

Extreme outliers are removed for this analysis.

|                    | LDH | S100 | CRP             | NLR            | Platelets | D-Dimers         | ADAMTS-13 activity | VWF:Ag |
|--------------------|-----|------|-----------------|----------------|-----------|------------------|--------------------|--------|
| LDH                | -   |      | 0.32<br>p=0.009 |                |           | 0.29<br>p=0.026  |                    |        |
| S100               |     | -    |                 |                |           |                  |                    |        |
| CRP                |     |      | -               | 0.3<br>p=0.037 |           | 0.52<br>p<0.0001 |                    |        |
| NLR                |     |      |                 | -              |           |                  |                    |        |
| Platelets          |     |      |                 |                | -         |                  |                    |        |
| D-Dimers           |     |      |                 |                |           | -                |                    |        |
| ADAMTS-13 activity |     |      |                 |                |           |                  | -                  |        |
| VWF:Ag             |     |      |                 |                |           |                  |                    | -      |
