# Supplementary figures and images for: Prognostic value of von Willebrand factor levels in patients with metastatic melanoma treated by immune checkpoint inhibitors
Source: HighWire-hosted journal article supplement (doi:10.1136/jitc-2022-006456), 2023-05-01

## Supplementary Figure 1

A

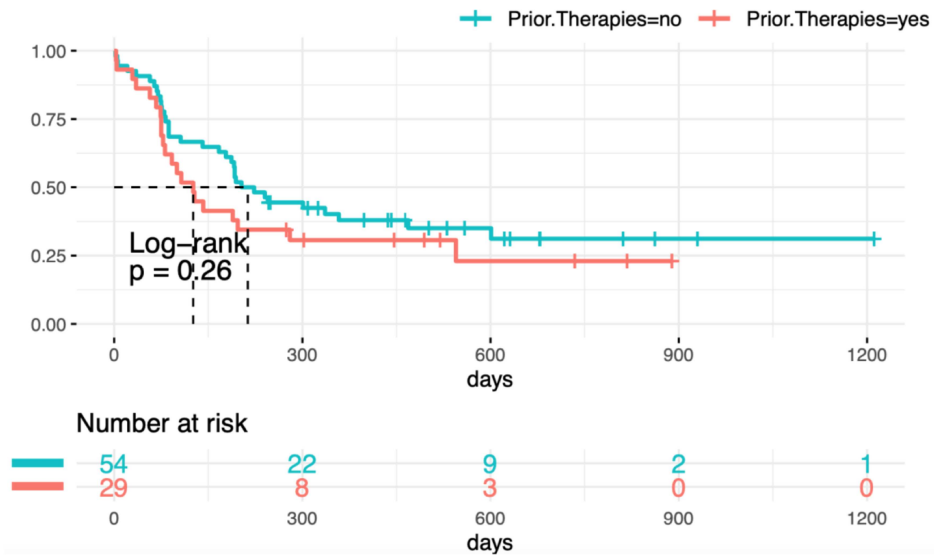

B

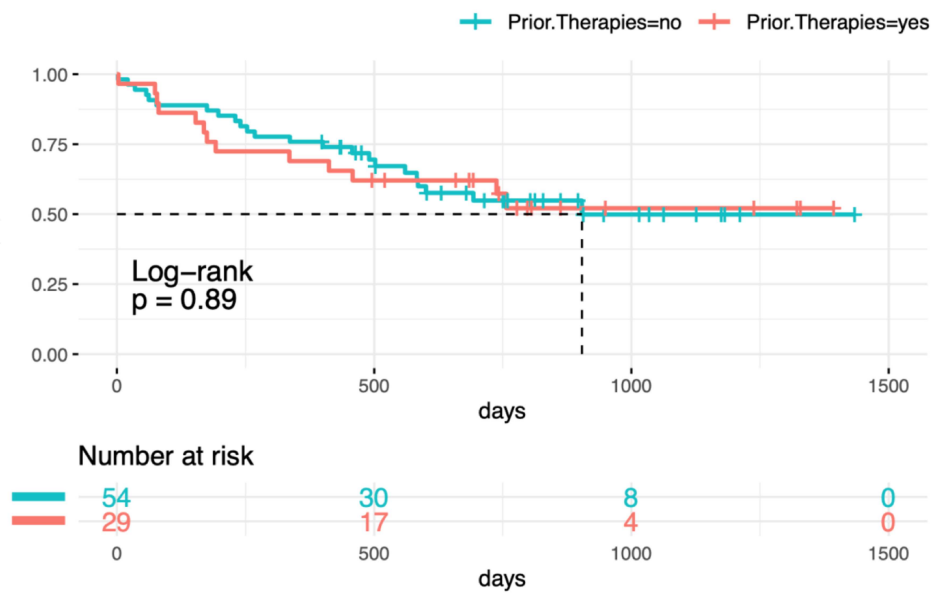

C

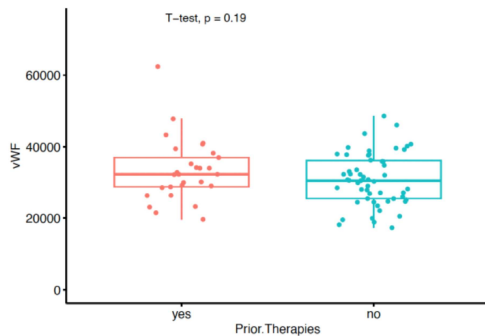

Supplement: jitc-2022-006456supp001_data_supplement.pdf [file jitc-2022-006456supp001_data_supplement.pdf]

## Supplementary Figure 2

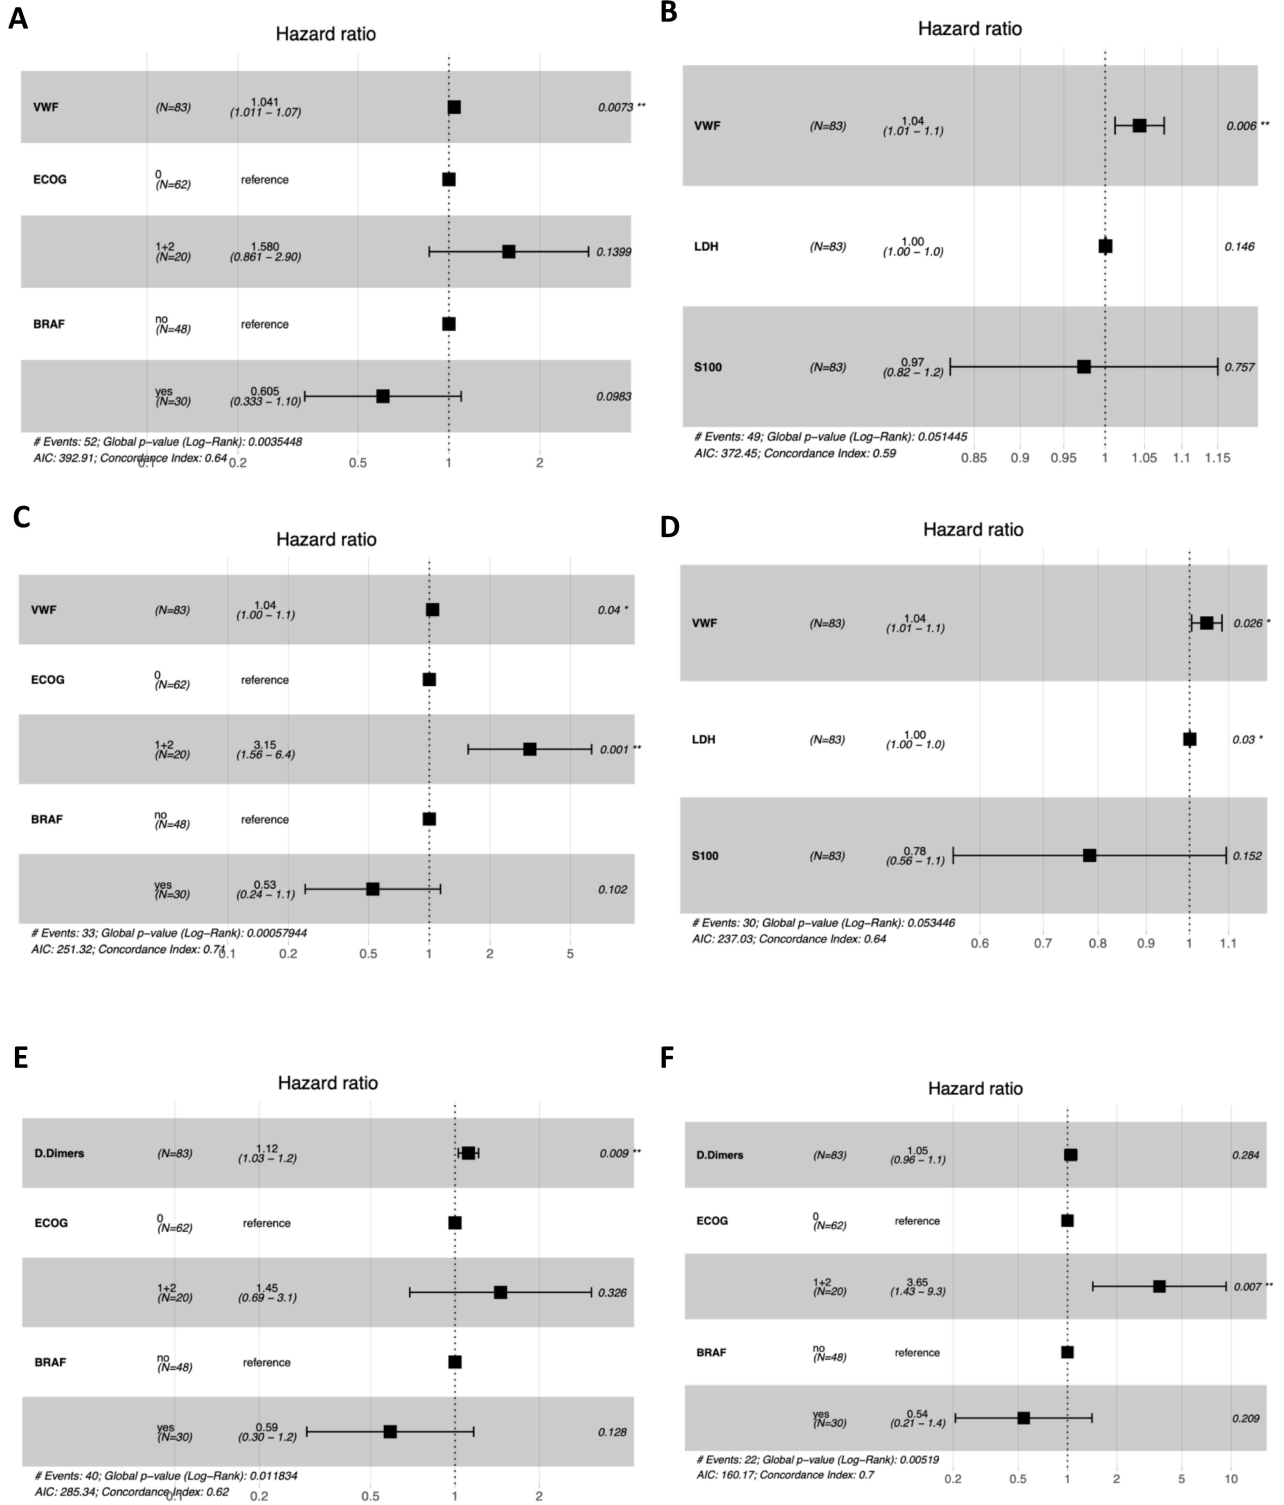

Supplement: jitc-2022-006456supp002_data_supplement.pdf [file jitc-2022-006456supp002_data_supplement.pdf]

## Supplementary Figure 3

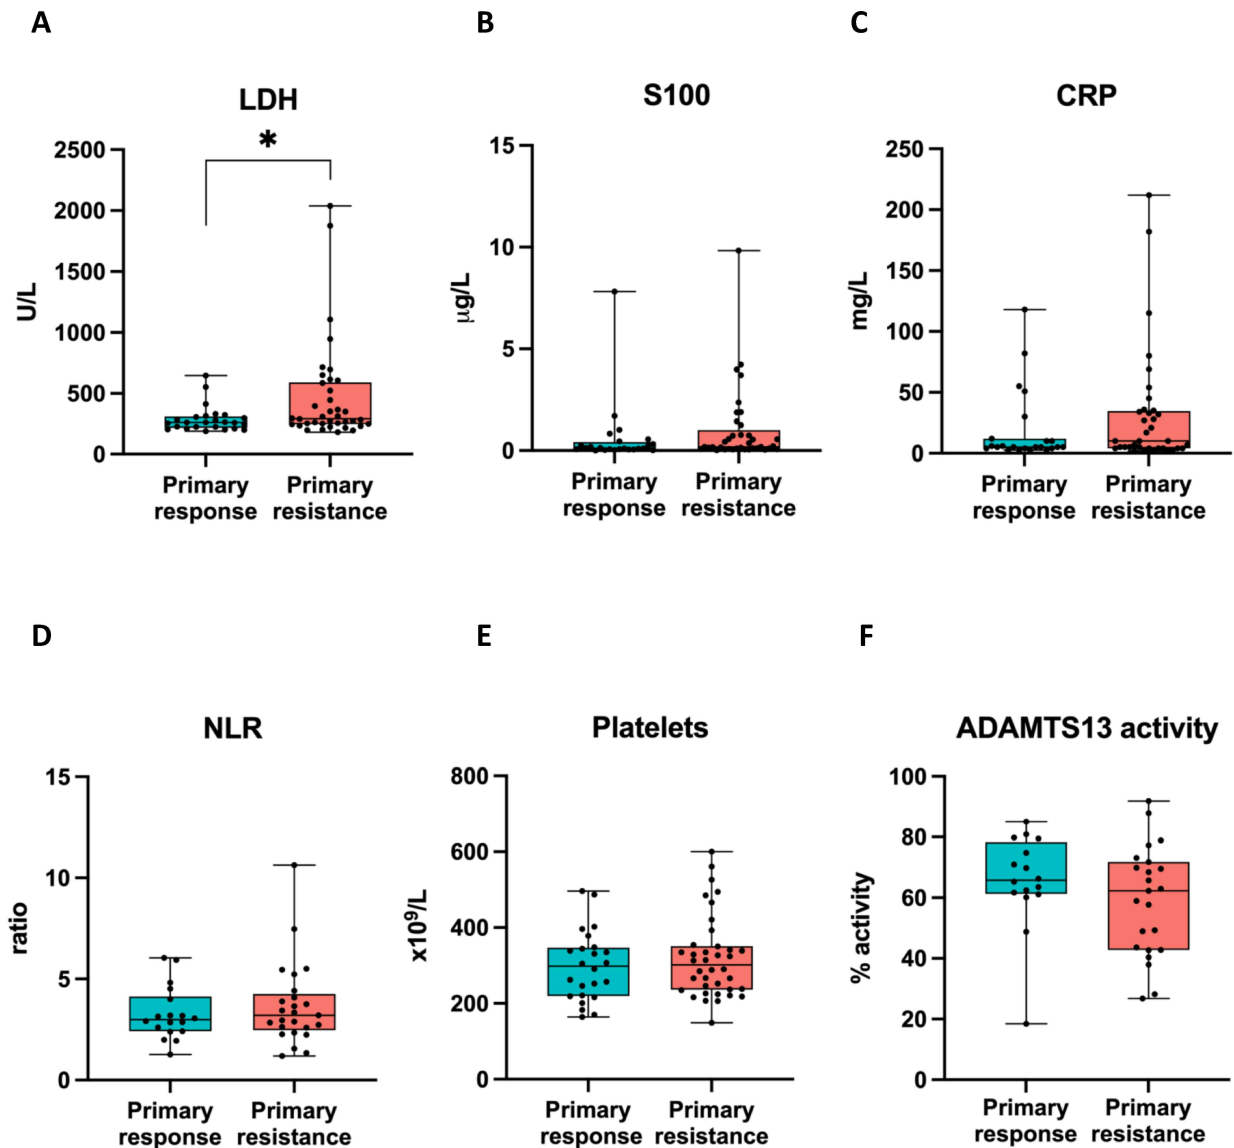

Supplement: jitc-2022-006456supp003_data_supplement.pdf [file jitc-2022-006456supp003_data_supplement.pdf]

## Supplementary Figure 4

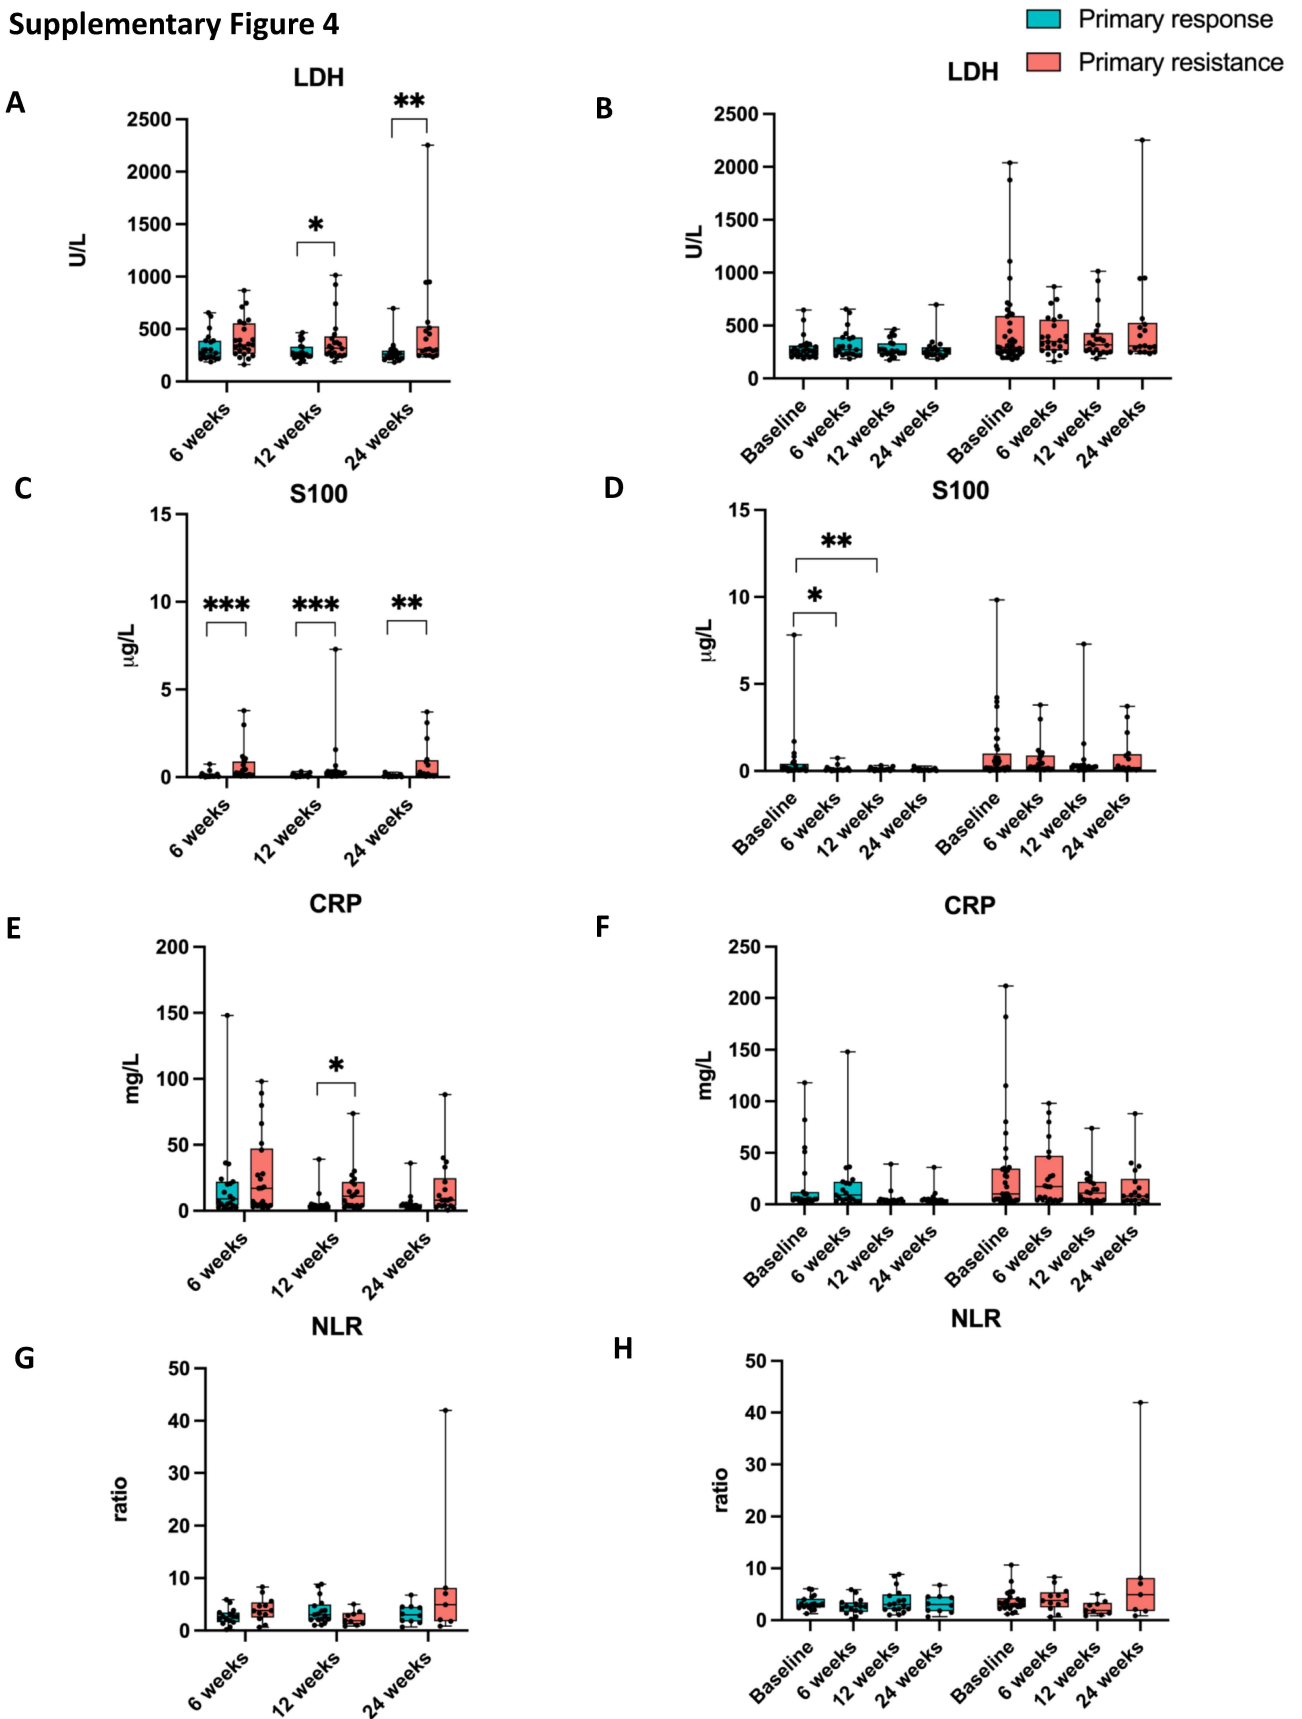

Supplement: jitc-2022-006456supp004_data_supplement.pdf [file jitc-2022-006456supp004_data_supplement.pdf]
